# Supplementary material for: Fast and reversible neural inactivation in macaque cortex by optogenetic stimulation of GABAergic neurons
Source: eLife journal article supplement (doi:10.7554/elife.52658), 2020-05-26
Supplement: supp [file elife-52658-supp-v1.zip]

## A. Figure 2—Figure Supplement 2

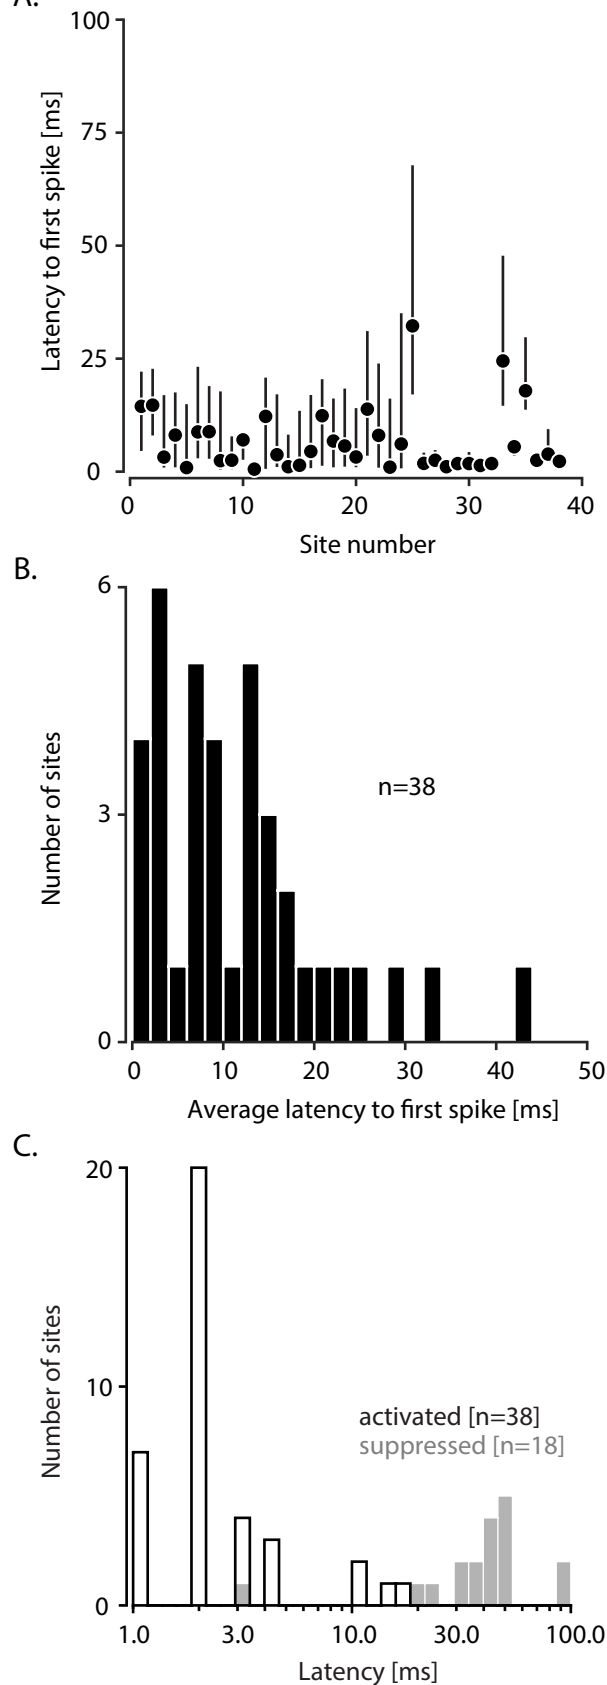

**Figure 2 – Figure Supplement 2.** Analysis of latency at activated ( $n=38$ ) and suppressed ( $n=18$ ) sites. **(A)** Analysis of latency to first spike at activated sites. Latency was defined as the time to first spike following optical stimulation on each trial. Black points represent medians across trials within a site, and the lower and the upper end of vertical black lines represent the 25<sup>th</sup> and 75<sup>th</sup> percentiles. **(B)** Histogram of average latencies to first spike following optogenetic activation. **(C)** Histogram of latencies at activated (black) and suppressed (gray) sites. For each site, firing rate was computed in a sliding 50 ms window from -50–150 ms after the laser was turned off. This firing rate was compared against the pre-laser firing rate (computed in a 50 ms window before optical stimulation). The time at which the firing rates in the two windows differed significantly was defined as the latency ( $p<0.05$ , Wilcoxon rank sum test).
