# Supplementary material for: Fast and reversible neural inactivation in macaque cortex by optogenetic stimulation of GABAergic neurons
Source: eLife journal article supplement (doi:10.7554/elife.52658), 2020-05-26
Supplement: supp [file elife-52658-supp-v1.zip]

**Figure 8—Figure Supplement 1**

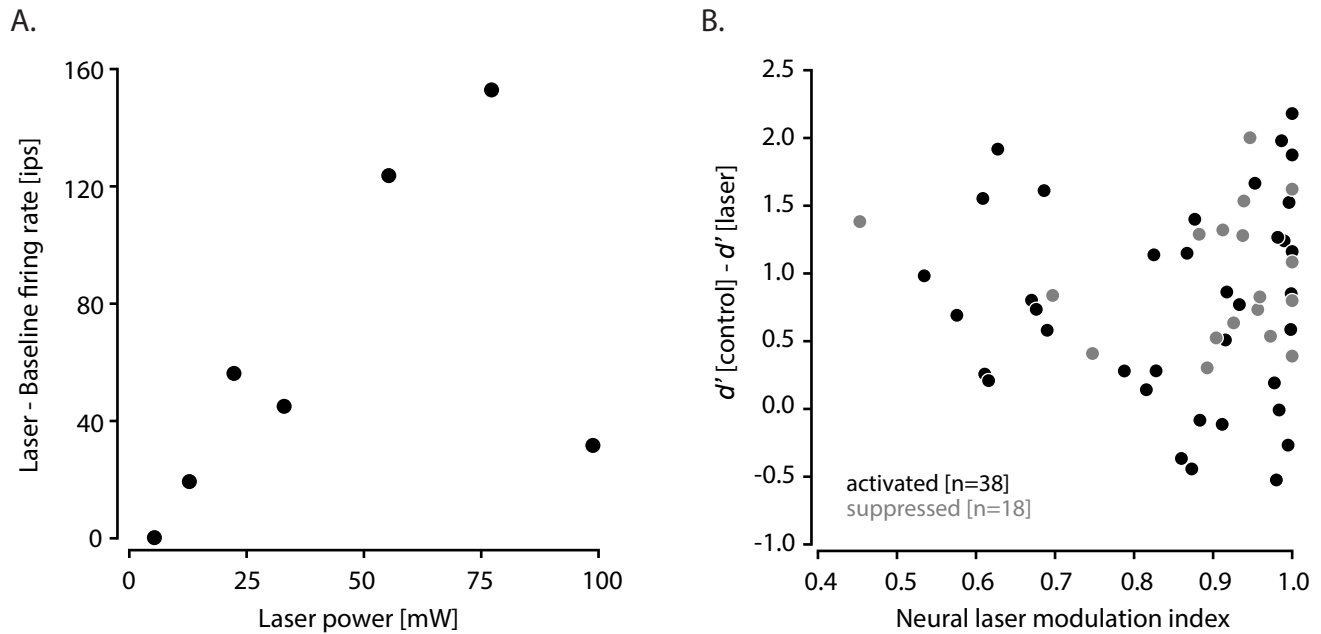

**Figure 8 – Figure Supplement 1.** Correlation between optogenetic effects on neural activity and behavior. **(A)** Effect of laser power on firing rate across seven blocks from a single session. The difference in laser-evoked firing rate and baseline firing rate is plotted as a function of laser power. Behavioral effects for these blocks of trials are shown in **Figure 8B**. **(B)** Relationship between neurophysiological and behavioral effects at the activated (black) and suppressed (gray) sites during the Gabor contrast detection task. Neurophysiological effects were computed as the absolute value of the difference between laser-evoked and baseline firing rate, divided by the sum of two.
