# Supplementary material for: Fast and reversible neural inactivation in macaque cortex by optogenetic stimulation of GABAergic neurons
Source: eLife journal article supplement (doi:10.7554/elife.52658), 2020-05-26
Supplement: supp [file elife-52658-supp-v1.zip]

**Figure 4—Figure Supplement 2**

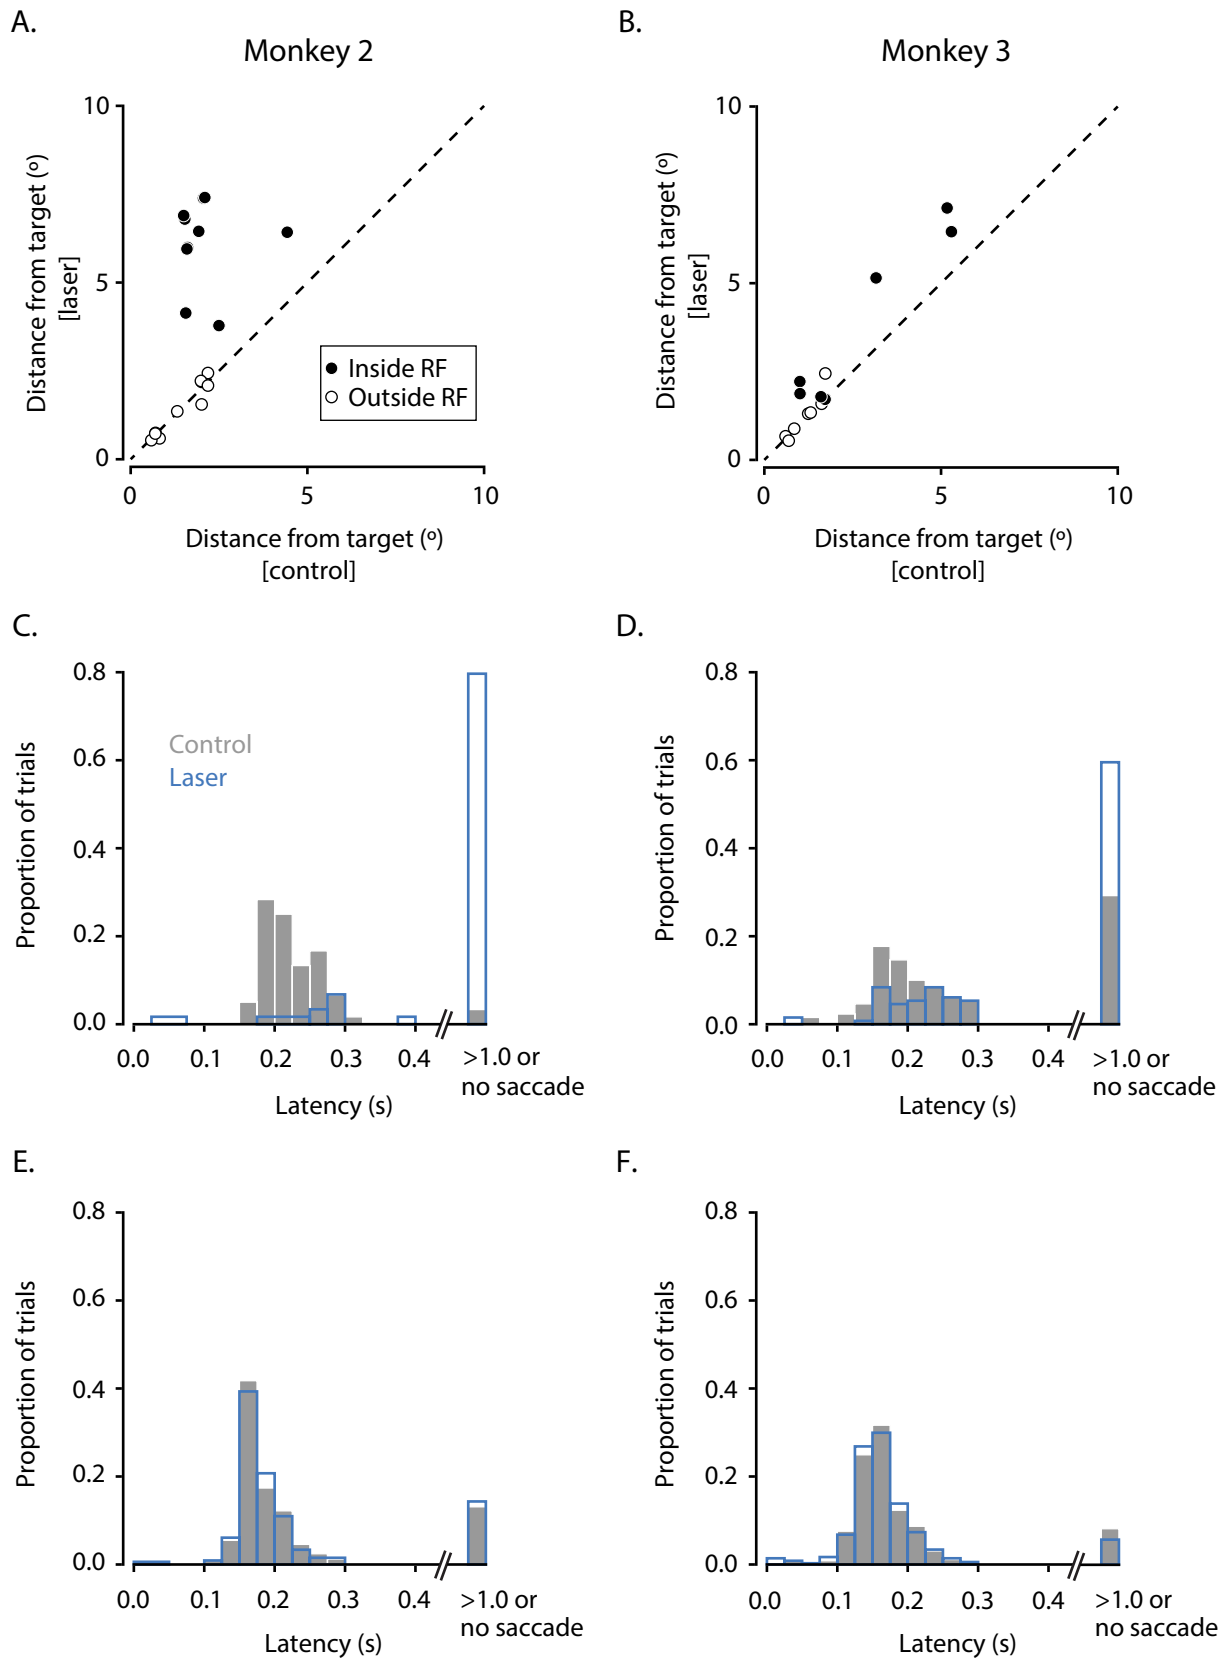

**Figure 4 – Figure Supplement 2.** Effects of optogenetic inactivation of V1 on visually guided saccade accuracy and latency. **(A,B)** Saccade accuracy (the average distance between saccade end points and target location) on control and laser trials. Data from trials in which the target appeared inside the RFs of the stimulated neurons (filled symbols) were analyzed separately from interleaved trials in which the target appeared in other locations (open symbols). **(C)** Histograms of saccade latency on control (gray) and laser (blue) trials when the target was presented inside the RF. **(E)** Histograms of saccade latency on control (gray) and laser (blue) trials when the target was presented outside the RF. **(B,D,F)** Data from monkey 3 in the same format as **(A,C,E)**.
