# Supplementary material for: Fast and reversible neural inactivation in macaque cortex by optogenetic stimulation of GABAergic neurons
Source: eLife journal article supplement (doi:10.7554/elife.52658), 2020-05-26
Supplement: supp [file elife-52658-supp-v1.zip]

**Figure 6—Figure Supplement 1**

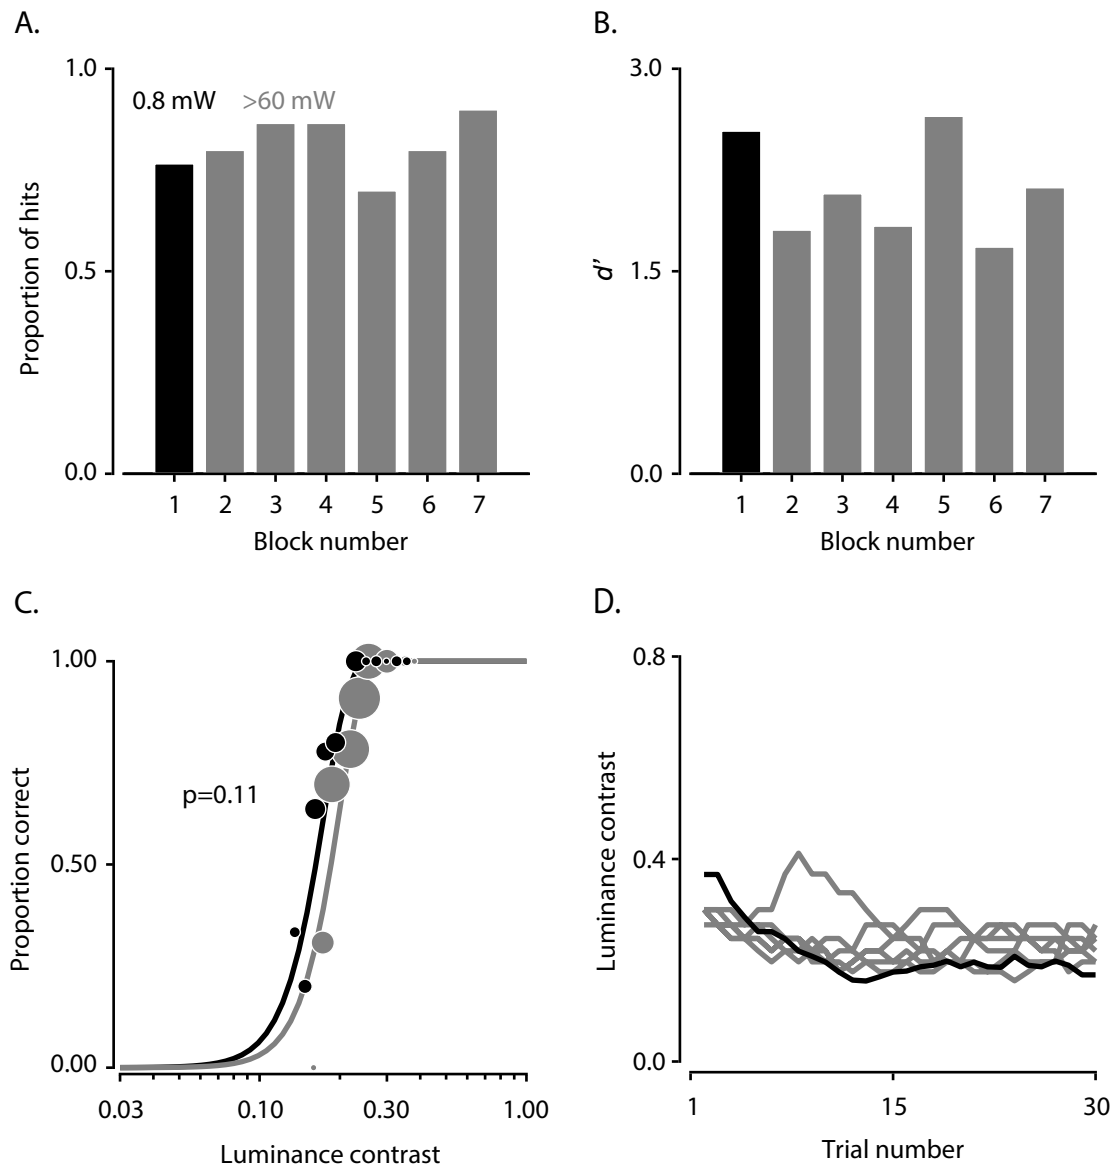

**Figure 6 – Figure Supplement 1.** Contrast detection threshold was stable across seven blocks collected during a single session from monkey 3. In the first block, the laser power was low (0.8 mW) and performance was statistically indistinguishable on laser and control trials. For this block only, data from laser and control trials were pooled. In the subsequent blocks, the laser power was > 60 mW, and performance was significantly impaired on laser trials ( $p < 0.05$  in all cases, binomial test of proportions). For these blocks, data from control trials are only presented. **(A)** Proportion of hits in each block is plotted in chronological order. **(B)**  $d'$  in each block is plotted in chronological order. **(C)** Psychometric functions in the first and the pooled subsequent blocks did not differ significantly ( $p = 0.11$ , Likelihood ratio test of separate Weibull fits to the first and the subsequent blocks data versus the best single fit to the pooled data). **(D)** Luminance contrast values selected by the staircase procedure as a function of trial number in each block.
