# Supplementary material for: Fast and reversible neural inactivation in macaque cortex by optogenetic stimulation of GABAergic neurons
Source: eLife journal article supplement (doi:10.7554/elife.52658), 2020-05-26
Supplement: supp [file elife-52658-supp-v1.zip]

A.

## Figure 1 – Figure Supplement 1

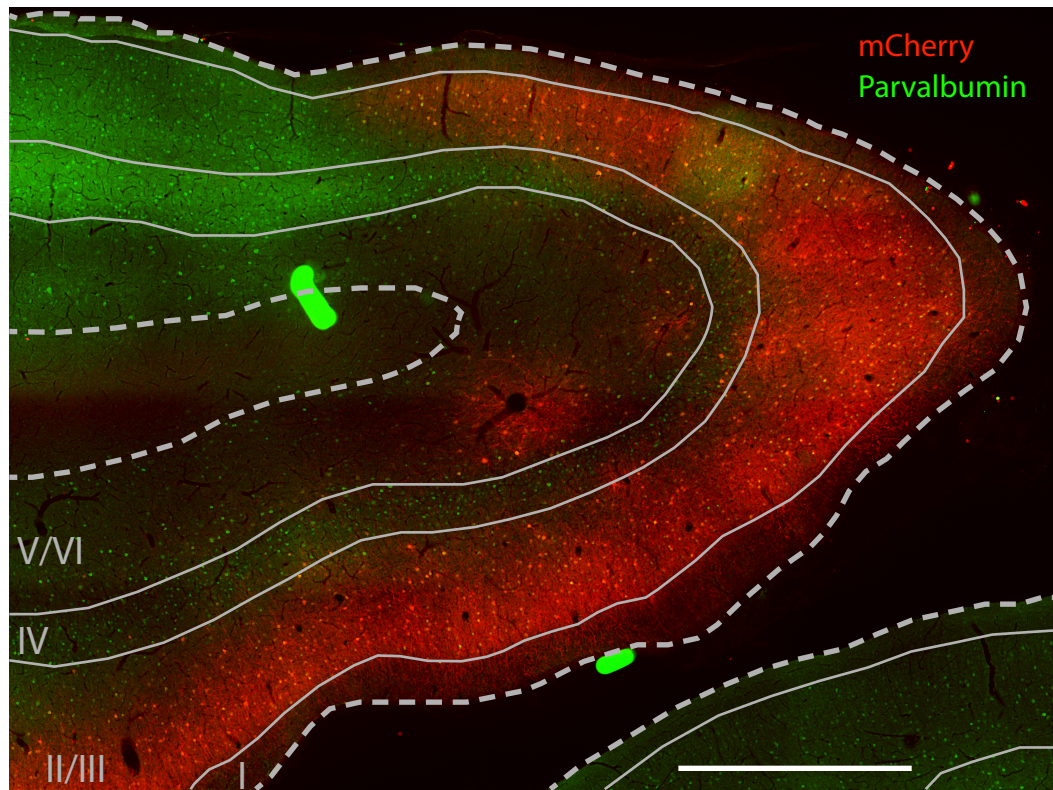

B.

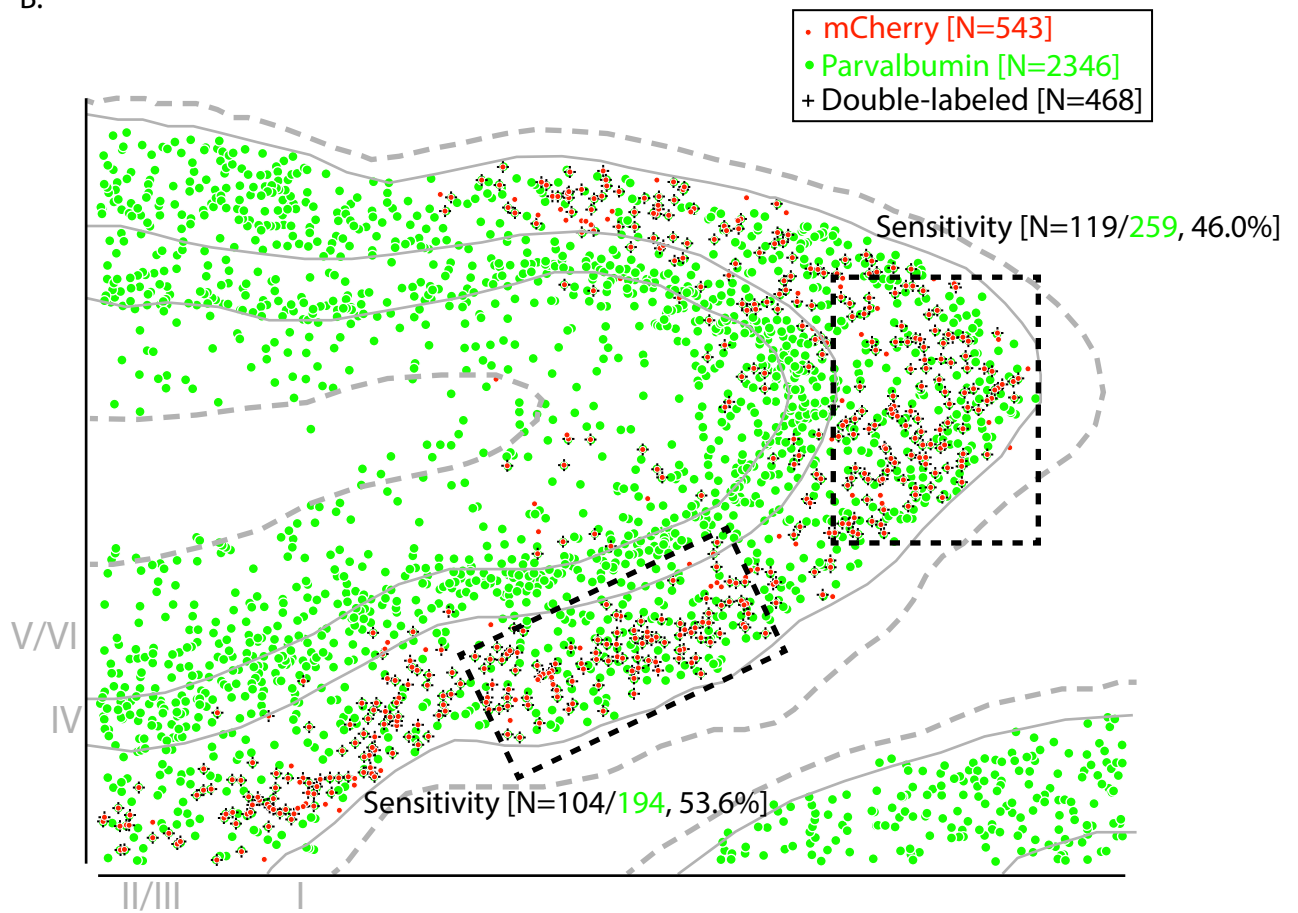

**Figure 1 – Figure Supplement 1.** Immunohistochemical analysis of transduction by AAV1-mDlx5/6-ChR2-mCherry. **(A)** A histological section of V1/V2 from monkey 1 processed with antibodies against parvalbumin (green) and mCherry (red), imaged at 10X. Scale bar is 1 mm. **(B)** Locations of cell bodies in **(A)** expressing mCherry (red), parvalbumin (green) or both (“+”). Sensitivity analysis of AAV-mDlx5/6-ChR2-mCherry transduction to PV+ neurons in two regions of efficient transduction.
