# Supplementary material for: Fast and reversible neural inactivation in macaque cortex by optogenetic stimulation of GABAergic neurons
Source: eLife journal article supplement (doi:10.7554/elife.52658), 2020-05-26
Supplement: supp [file elife-52658-supp-v1.zip]

**Figure 2—Figure Supplement 3**

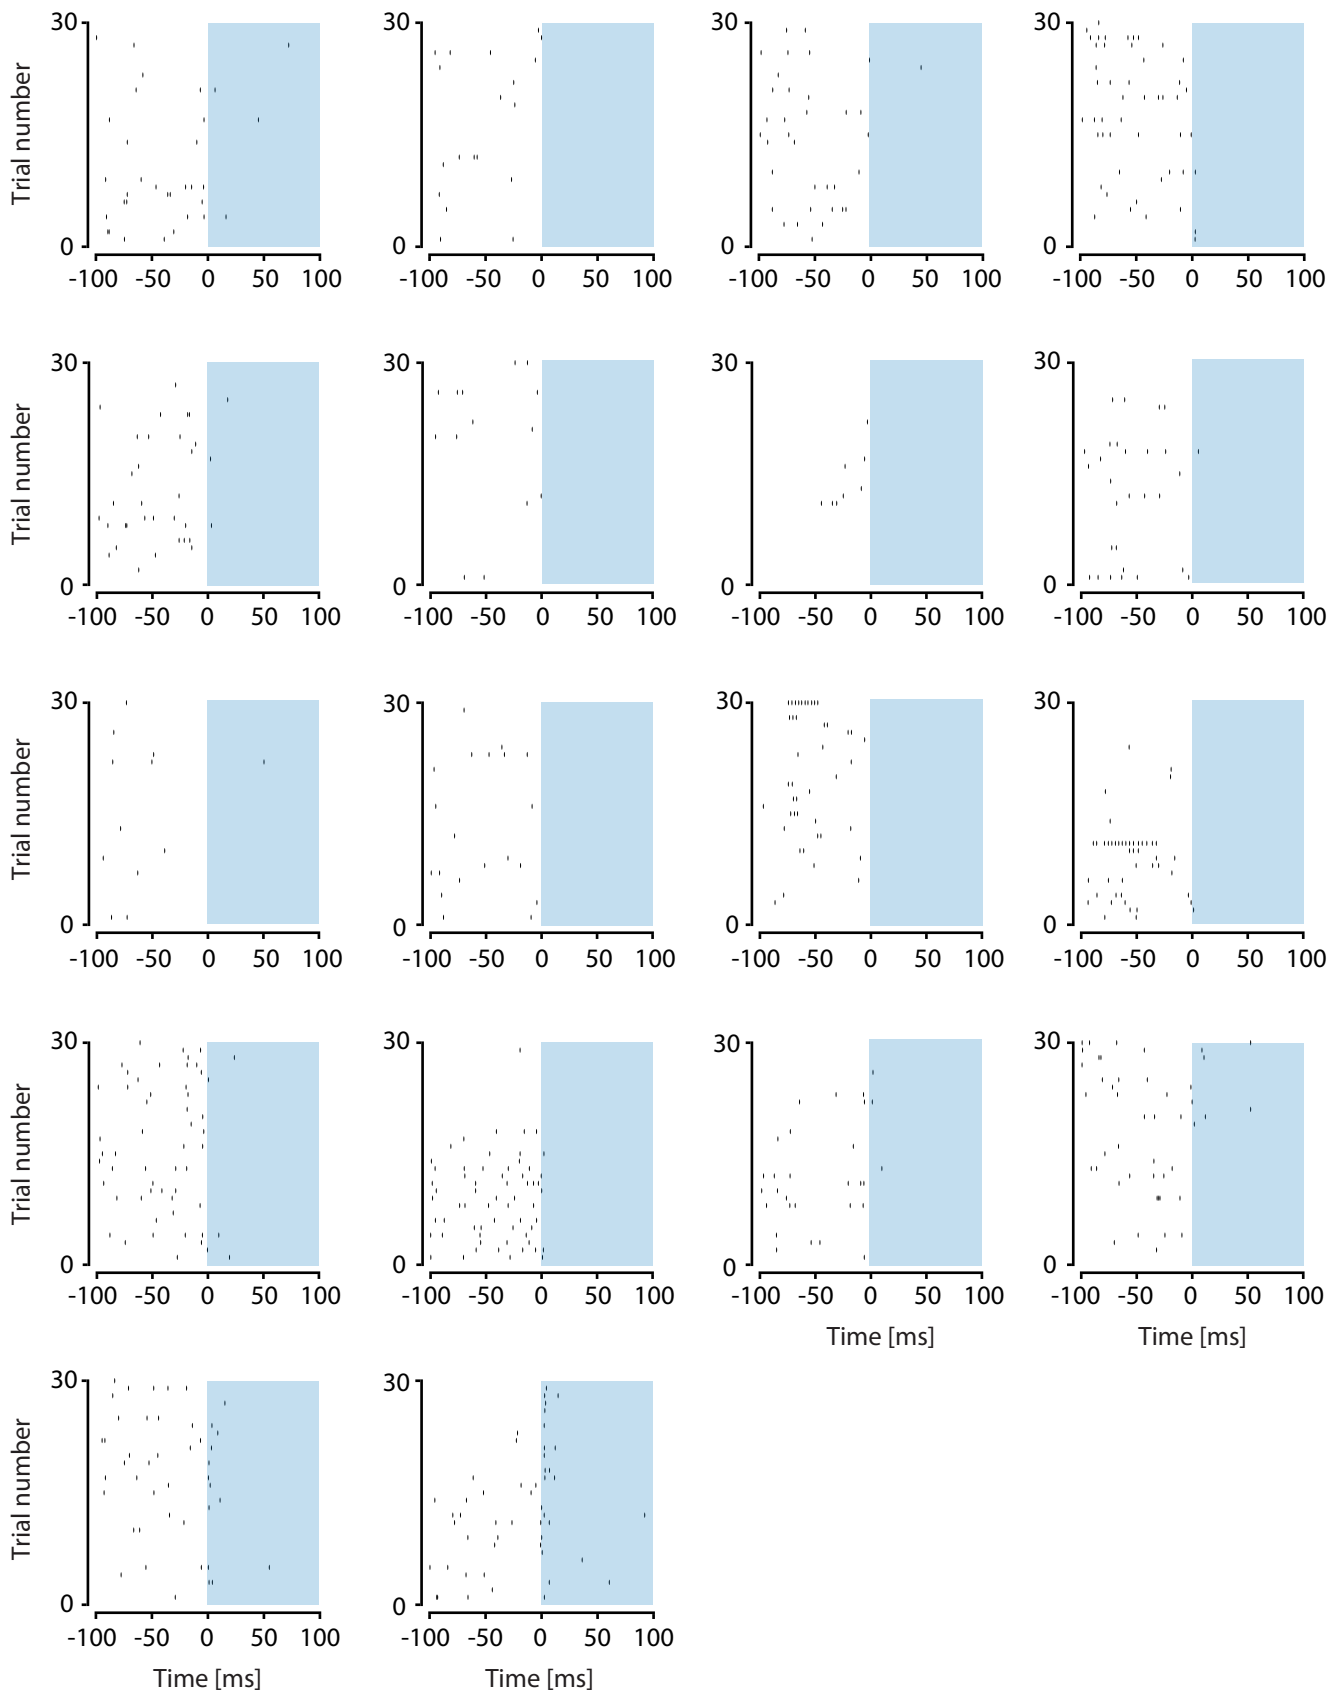

**Figure 2 – Figure Supplement 3.** Rasters from all of the 18 suppressed sites. Responses are aligned to the onset of optical stimulation.
