# Supplementary material for: Fast and reversible neural inactivation in macaque cortex by optogenetic stimulation of GABAergic neurons
Source: eLife journal article supplement (doi:10.7554/elife.52658), 2020-05-26
Supplement: supp [file elife-52658-supp-v1.zip]

## Figure 2 – Figure Supplement 1

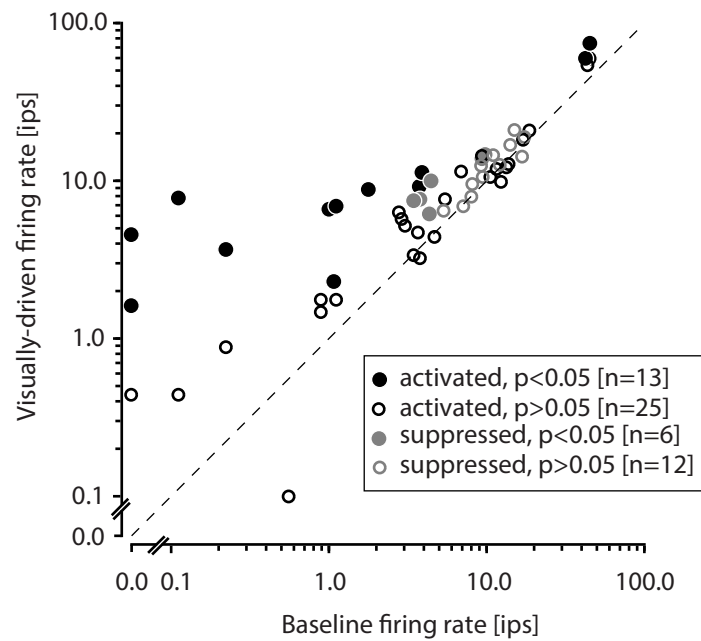

**Figure 2 – Figure Supplement 1.** Analysis of visually-driven responses (in impulses per second, ips) at activated and suppressed sites. Visually-driven firing rate was computed during the Gabor stimulus presentation period (200 ms) and plotted against the baseline firing rate. A total of 46 sites were driven by visual stimuli. 19 of those were significantly visually-driven.
