# Supplementary material for: Fast and reversible neural inactivation in macaque cortex by optogenetic stimulation of GABAergic neurons
Source: eLife journal article supplement (doi:10.7554/elife.52658), 2020-05-26
Supplement: supp [file elife-52658-supp-v1.zip]

## Figure 4—Figure Supplement 1

Monkey 3

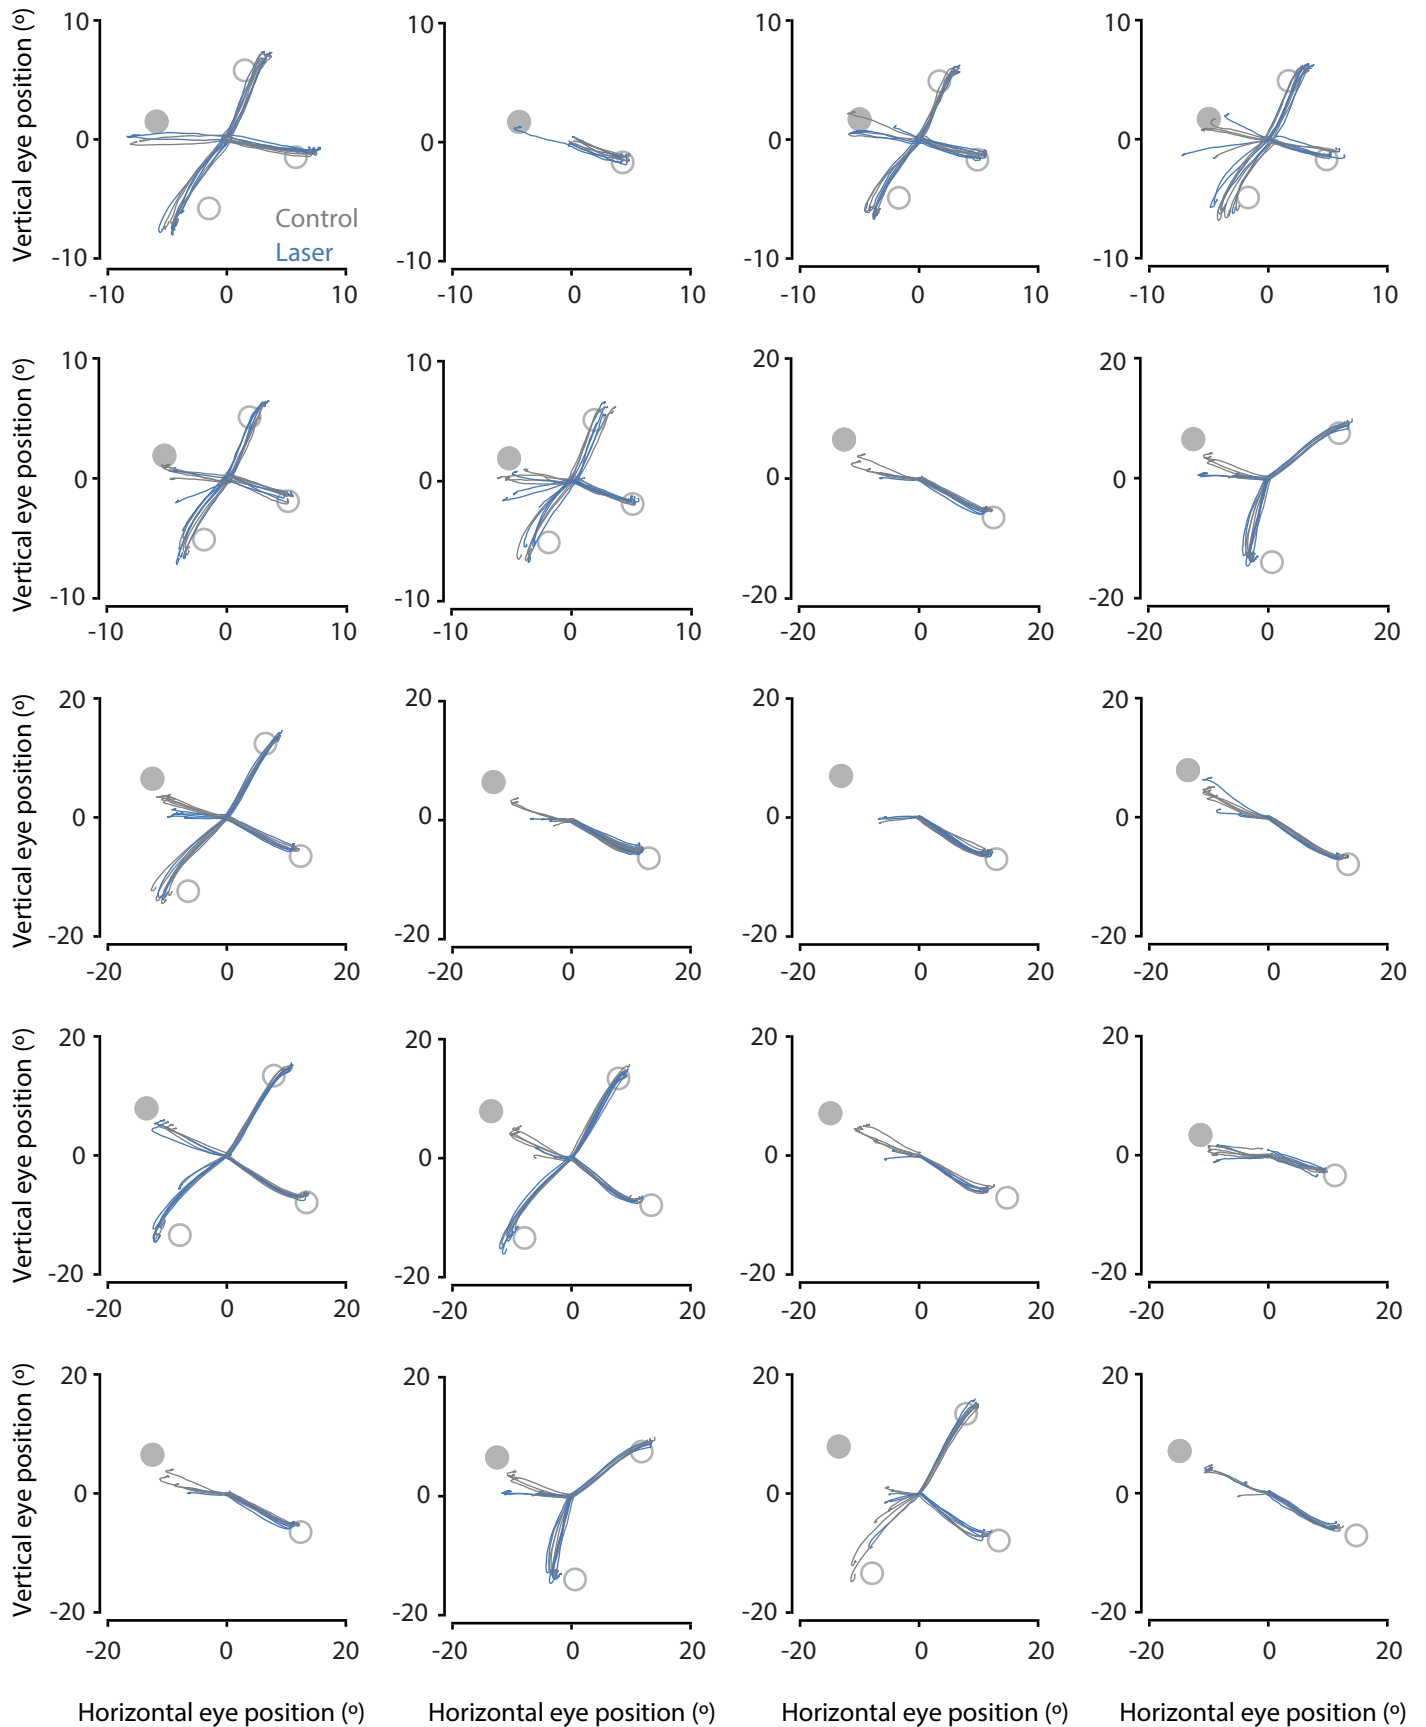

**Figure 4 – Figure Supplement 1.** Effect of optogenetic inactivation on visually guided saccades from Monkey 3. Data are shown from each individual block of trials. Gray traces show saccades on control trials, and the blue traces show saccades on laser trials. The position of the target inside the RF of the illuminated neurons (gray filled circle) and outside (gray unfilled circle) are shown.
